# Supplementary material for: Hyperthyroidism, but not hypertension, impairs PITX2 expression leading to Wnt-microRNA-ion channel remodeling
Source: PubMed Central journal article supplement (PMC5711019; doi:10.1371/journal.pone.0188473), 2017-12-01
Supplement: pone.0188473.s001.pdf [file pone.0188473.s001.pdf]

Table 1. Lozano-Velasco et al.

| Gene                     | Specie                   | Oligo                        | Sequences                                          |
|--------------------------|--------------------------|------------------------------|----------------------------------------------------|
| Atp2a2 (NM_001110139.2)  | <i>Rattus norvegicus</i> | Rn_Atp2a2_F<br>Rn_Atp2a2_R   | CTGTCCATGTCCCTCCACTT<br>CCTCCAGATAGTTCCGAGCA       |
| Camk2a (NM_012519.2)     | <i>Rattus norvegicus</i> | Rn_Camk2a_F<br>Rn_Camk2a_R   | TGGAAGGGATGGACTTTACAC<br>ATTCTGCCACTTCCCATCAC      |
| Cat (NM_012520.2)        | <i>Rattus norvegicus</i> | Rn_Cat_F<br>Rn_Cat_R         | GAGAACATTGCCAACACCCT<br>CTTTTCCCTTGGCAGCTATG       |
| Casq2 (NM_017131.2)      | <i>Rattus norvegicus</i> | Rn_Casq2_F<br>Rn_Casq2_R     | TGGCTATGAGTTTCTGGAGA<br>CATTACCACCCCAATCTGT        |
| Enpep (NM_022251.2)      | <i>Rattus norvegicus</i> | Rn_Enpep_F<br>Rn_Enpep_R     | AAATGCTCAAAGACCCCAAT<br>CTGCAGCTCAGTGTTGAAGG       |
| Gapdh (NM_017008.4)      | <i>Rattus norvegicus</i> | Rn_Gapdh_F<br>Rn_Gapdh_R     | TCCCATTCTTCCACCTTTGA<br>CCAGGGTTTCTTACTCCTTGG      |
| Gpx1 (NM_030826.4)       | <i>Rattus norvegicus</i> | Rn_Gpx1_F<br>Rn_Gpx1_R       | GTCCACCGTGTATGCCTTCT<br>GAACTGATTGCACGGGAAAC       |
| Gsr (NM_053906.2)        | <i>Rattus norvegicus</i> | Rn_Gsr_F<br>Rn_Gsr_R         | GGCCATATCCTAGTGGACGA<br>AGACCACGGTAGGGATGTTG       |
| GusB (NM_017015.2)       | <i>Rattus norvegicus</i> | Rn_GusB_F<br>Rn_GusB_R       | AGATGTACCAGAAGCCAATTATCC<br>ATTCTTTTCGTTTCTCATCCAG |
| Kcnj2 (NM_017296.1)      | <i>Rattus norvegicus</i> | Rn_Kcnj2_F<br>Rn_Kcnj2_R     | TGAAAATGAAGTTGCCCTAACA<br>TCTCCGATTCTCGCCTTAAA     |
| Kcnj12 (NM_053981.2)     | <i>Rattus norvegicus</i> | Rn_Kcnj12_F<br>Rn_Kcnj12_R   | GCCACTGACCGAGAAGTGC<br>GGCGCCTGACATGGTAAC          |
| Kcnn3 (NM_019315.2)      | <i>Rattus norvegicus</i> | Rn_Kcnn3_F<br>Rn_Kcnn3_R     | ACCAACTGAGGGGTGTCAAG<br>ATTGAAAGCTGGCTGTGAGGT      |
| Pitx2 (NM_019334.2)      | <i>Rattus norvegicus</i> | Rn_Pitx2_F<br>Rn_Pitx2_R     | CTGGAAGCCACTTTCCAGAG<br>CAGCCCAATTGTTGTACGAG       |
| Pln (NM_022707.2)        | <i>Rattus norvegicus</i> | Rn_Pl_n_F<br>Rn_Pl_n_R       | GCTGAGCTCCCAGACTTACAC<br>CATGATGCCAGGAAGACAAA      |
| Ryr2 (NM_001191043.1)    | <i>Rattus norvegicus</i> | Rn_Ryr2_F<br>Rn_Ryr2_R       | CTGTGGGATAGGCAACGACT<br>GGGAAAAATTTCCCAACACCT      |
| Scn1b (NM_001271045.1)   | <i>Rattus norvegicus</i> | Rn_Scn1b_F<br>Rn_Scn1b_R     | TATGGCATCCATCGTGTGACG<br>CGCCTGTACAGTTCTCTTTGCG    |
| Scn5a (NM_001160162.1)   | <i>Rattus norvegicus</i> | Rn_Scn5a_F<br>Rn_Scn5a_R     | ATGACGGAGGAGCAGAAGAA<br>GGAACATGATGGTGACATCG       |
| Sod1 (NM_017050.1)       | <i>Rattus norvegicus</i> | Rn_Sod1_F<br>Rn_Sod1_R       | CCACTGCAGGACCTCATTTT<br>CACCTTTGCCCAAGTCATCT       |
| Sod2 (NM_017051.2)       | <i>Rattus norvegicus</i> | Rn_Sod2_F<br>Rn_Sod2_R       | CCGAGGAGAAGTACCACGAG<br>GCTTGATAGCCTCCAGCAAC       |
| Wnt8a (NM_001106155.1)   | <i>Rattus norvegicus</i> | Rn_Wnt8a_F<br>Rn_Wnt8a_R     | CTGTGGCTGTGATGAGTCAAA<br>CAGCCCTGTTGTTGTGAAGA      |
| Wnt11 (NM_080401.1)      | <i>Rattus norvegicus</i> | Rn_Wnt11_F<br>Rn_Wnt11_R     | CAGGATCCCAAGCCAATAAA<br>TAGGCCGGTGTACCACTTTC       |
| Zfhx3 (XM_008772567.2)   | <i>Rattus norvegicus</i> | Rn_Zfhx3_F<br>Rn_Zfhx3_R     | CATGCTCAACAACAAGATCCA<br>GGACTCTAGACCTAGACACCGAAA  |
| Cacna1c (NM_001159535.2) | <i>Mus musculus</i>      | Mm_Cacna1c_F<br>Mm_Cacna1c_R | TCCTGGTCTGAGGAGACGAC<br>GGTGGTGACCTCGATGAACCT      |
| Camk2a (NM_177407.4)     | <i>Mus musculus</i>      | Mn_Camk2a_F<br>Mm_Camk2a_R   | AATGGCAGATCGTCCACTTC<br>TGGCGACTTCTGTGAACAAG       |
| Cat (NM_009804.2)        | <i>Mus musculus</i>      | Mm_Cat_F<br>Mm_Cat_R         | ATCCAGGCTCTTCTGGACAA<br>TCCATCCAGCGTTGATTACA       |
| Gapdh (NM_008084.2)      | <i>Mus musculus</i>      | Mm_Gapdh_F<br>Mm_Gapdh_R     | GGCATTGCTCTCAATGACAA<br>TGTGAGGGAGATGCTCAGTG       |
| Gusb (NM_010368.1)       | <i>Mus musculus</i>      | Mm_GusB_F<br>Mm_GusB_R       | ACGCATCAGAAGCCGATTAT<br>ACTCTCAGCGGTGACTGGTT       |

|                                |                     |                            |                                               |
|--------------------------------|---------------------|----------------------------|-----------------------------------------------|
| <i>Hcn4</i> (NM_001081192.1)   | <i>Mus musculus</i> | Mm_Hcn4_F<br>Mm_Hcn4_R     | CAGCGTCAGAGCGGATACTT<br>TGTGGAGGAGGATGGAGTTC  |
| <i>Kcnj2</i> (NM_008425.4)     | <i>Mus musculus</i> | Mm_Kcnj2_F<br>Mm_Kcnj2_F   | TTGCTTCGGCTCATTCTCTT<br>AGAGATGGATGCTTCCGAGA  |
| <i>Pitx2c</i> (NM_001042502.1) | <i>Mus musculus</i> | Mm_Pitx2c_F<br>Mm_Pitx2c_R | CCTCACCTTCTGTCACCAT<br>GCCACATCCTCATTCTTTC    |
| <i>Prdx2</i> (NM_001317385.1)  | <i>Mus musculus</i> | Mm_Prdx2_F<br>Mm_Prdx2_R   | CTTCGCCAGATCACAGTCAA<br>AAATCCAAGCTTCAGGCTCA  |
| <i>Prdx3</i> (NM_007452.2)     | <i>Mus musculus</i> | Mm_Prdx3_F<br>Mm_Prdx3_R   | TGGACACCAGAGTCCCCTAC<br>TCAAGGCATTGGAAGGATTC  |
| <i>Prdx5</i> (NM_012021.2)     | <i>Mus musculus</i> | Mm_Prdx5_F<br>Mm_Prdx5_R   | TGGGAAGGCGACAGACTTAT<br>CAGGGCCTCAGAGTTGAGAG  |
| <i>Prdx6</i> (NM_007453.4)     | <i>Mus musculus</i> | Mm_Prdx6_F<br>Mm_Prdx6_R   | TTTTGGCCCTGACAAGAAAC<br>GAGGGTGGGAACCATCA     |
| <i>Ryr2</i> (NM_023868.2)      | <i>Mus musculus</i> | Mm_Ryr2_F<br>Mm_Ryr2_R     | TGGGATTGGCAACGATTATT<br>GGGAAAAATTCCCAACACCT  |
| <i>Scn5a</i> (NM_021544.4)     | <i>Mus musculus</i> | Mm_Scn5a_F<br>Mm_Scn5a_R   | CTTCACCAACAGCTGGAACA<br>CATGACGAGGAAGAGGAGGA  |
| <i>Sod2</i> (NM_013671.3)      | <i>Mus musculus</i> | Mm_Sod2_F<br>Mm_Sod2_R     | GCAAGGAACAACAGGCCTTA<br>AGCACCCAGTCATAGTGCT   |
| <i>Wnt8a</i> (NM_009290.2)     | <i>Mus musculus</i> | Mm_Wnt8a_F<br>Mm_Wnt8a_R   | TTCGTGGACAGTTTGGAGAA<br>GCGGTCATACTTGGCCTTTA  |
| <i>Wnt11</i> (NM_001285792.1)  | <i>Mus musculus</i> | Mm_Wnt11_F<br>Mm_Wnt11_R   | GGCCTGTGAAGGACTCAGAA<br>ACCACTCTGTCCGTGTAGGG  |
| <i>Zfhx3</i> (XM_006530585.3)  | <i>Mus musculus</i> | Mm_Zfhx3_F<br>Mm_Zfhx3_R   | GACTGGCAGCTCAACAACAA<br>CCATCAGGTTTCGTTTTAGGA |

---

|          |                     |                 |                        |
|----------|---------------------|-----------------|------------------------|
| miR-1    | <i>Mus musculus</i> | hsa-miR-1-3p    | UGGAAUGUAAAGAAGUAUGUAU |
| miR-29a  | <i>Mus musculus</i> | hsa-miR-29a-3p  | UAGCACCAUCUGAAAUCGGUUA |
| miR-106b | <i>Mus musculus</i> | hsa-miR-106b-5p | UAAAGUGCUGACAGUGCAGAU  |
| miR-200a | <i>Mus musculus</i> | hsa-miR-200a-3p | UAACACUGUCUGGUAACGAUGU |

---

|          |                     |                                   |                                                         |
|----------|---------------------|-----------------------------------|---------------------------------------------------------|
| siEnpep  | <i>Mus musculus</i> | siEnpep_sense<br>siEnpep_asense   | S 5': GAUAGUUUAAGACCGAUCA<br>AS 3': CUAUCAAAUUCUGGCUAGU |
| siSod2   | <i>Mus musculus</i> | siSod2_sense<br>siSod2_asense     | S 5': CUUUCUCAGUAGCGGCAAA<br>AS 3': GAAAGAGUCAUCGCCGUUU |
| siPitx2c | <i>Mus musculus</i> | siPitx2c_sense<br>siPitx2c_asense | S 5': GUGCAUACAAUCUCCGAUA<br>AS 3': CACGUAUGUUAGAGGCUAU |

---
